# Supplementary figures and images for: Influence of substitution pattern on the dynamics of internal conversion and intersystem crossing in thiopyridone isomers
Source: Royal Society of Chemistry journal article supplement (doi:10.1039/d5cp01456e), 2025-01-01

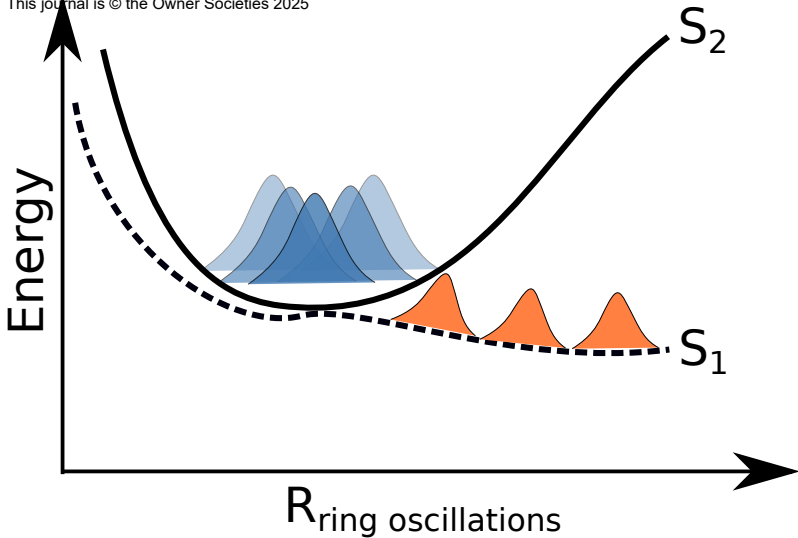

Supplement: d5cp01456e1.pdf [file d5cp01456e1.pdf]
